# Supplementary material
Source: PubMed Central journal article supplement (PMC9724881)
Supplement: EIJ-D-20-01275_Mori_SD.pdf [file EIJ-D-20-01275_Mori_SD.pdf]

## **Supplementary data**

### **Supplementary Appendix 1. Study design and population**

Patients were enrolled in the registry from January 2009 to December 2019. We included patients with clinical presentation compatible with acute coronary syndrome and meeting criteria for SCAD [1,2]. Patients with significant ( $\geq 50\%$ ) atherosclerotic disease in other coronary arterial segments or with an underlying complicated plaque as revealed by intracoronary imaging were excluded. Data on demographics, clinical presentation, treatment modality, angiographic findings, management, and early and late outcomes were extracted from clinical source documents or collected via medical records, patient interviews, and follow-up visits. A dedicated data manager (L. Lo Savio) was in charge of source verification, quality control, and queries generation from the coordinating centre to the participating sites to minimise bias. Follow-up data were collected by each centre through review of medical records or during outpatient visits and/or telephone contacts. The study was conducted in accordance with the Declaration of Helsinki.

### **Supplementary Appendix 2. Angiographic analysis and classification**

All coronary angiograms were sent to the coordinating centre and reviewed by two experienced interventional cardiologists (G. Quadri, C. Rolfo) for diagnostic confirmation. In case of disagreement, consensus was achieved after discussion with a third interventional cardiologist (F. Tomassini). Diagnostic criteria were based on angiography and intracoronary imaging data (whenever available) as previously described [1,2]. For the classification of SCAD, we followed the one proposed by Adlam et al [2] in the ESC-ACCA position paper on SCAD using five categories (**Supplementary Figure 1**).

After diagnosis corroboration of SCAD at the coordinating centre, the angiographic classification was performed in a second stage by both the registry coordinating centre (G. Quadri, C. Rolfo, E. Cerrato) and the study leading centre (R. Mori, F. Macaya, J. Escaned) with a previous consensus agreement on the specific criteria to be used, as well as subsequent online meetings to discuss unclear cases. The angiographic classification criteria used were as follows: angiotype 1 is the classic angiographic radiolucent flap or linear double lumen, often associated with contrast hold-up. Angiotype 2 is characterised by a long diffuse ( $\geq 20$  mm by quantitative coronary angiography) and smooth stenosis, corresponding to an angiographically contained intramural haematoma (small fenestrations of the intimomedial lamina cannot be excluded solely on the grounds of angiography). This angiotype is further divided into angiotype 2A, in which there is recrudescence of normal distal vessel calibre, and angiotype 2B, where the stenosis (haematoma) involves angiographically the entire distal segment. Angiotype 3 consists of ambiguous stenoses shorter than 20 mm (by quantitative coronary angiography), angiographically indistinguishable from a focal atherosclerotic stenosis, that require diagnostic confirmation by means of intracoronary imaging or a scheduled surveillance angiogram confirming vessel healing. This angiotype also corresponds to an angiographically contained intramural haematoma. Finally, angiotype 4 SCAD corresponds to a total occlusion of the main dissected vessel or large branches with TIMI 0 flow. For diagnosing angiotype 4, the presence of other typical angiographic characteristics (angiotypes 1 and 2), visible at the time of the baseline injections, during PCI or in surveillance angiograms, was necessary to establish the diagnosis of SCAD when intracoronary imaging was not used. A sixth category, the angiotype 1/2 (comprising features of both angiotypes 1 and 2 in the same lesion), was dismissed for the sake of simplicity and classified as angiotype 1.

### **Supplementary Appendix 3. Statistical analysis**

Angiographic type was the grouping variable (five groups). Non-categorical variables are summarised using means and were compared using ANOVA or Kruskal-Wallis tests according

to normality of distributions. Categorical variables are expressed as percentages and were compared using the chi-square or Fisher's exact tests if required. Kaplan-Meier curves were plotted for the time to occurrence of MACE by each angiographic type and were compared using the log-rank test, as it is the recommended test for infrequent events where the compared curves do not intersect. Multivariate adjustment was conducted using Cox regression including covariables with a significance level below 0.20 in the univariate analysis. Statistical significance was established at  $p \leq 0.05$  (two-tailed) for all tests. All statistical analyses were conducted using Stata IC 14.1 (StataCorp, College Station, TX, USA).

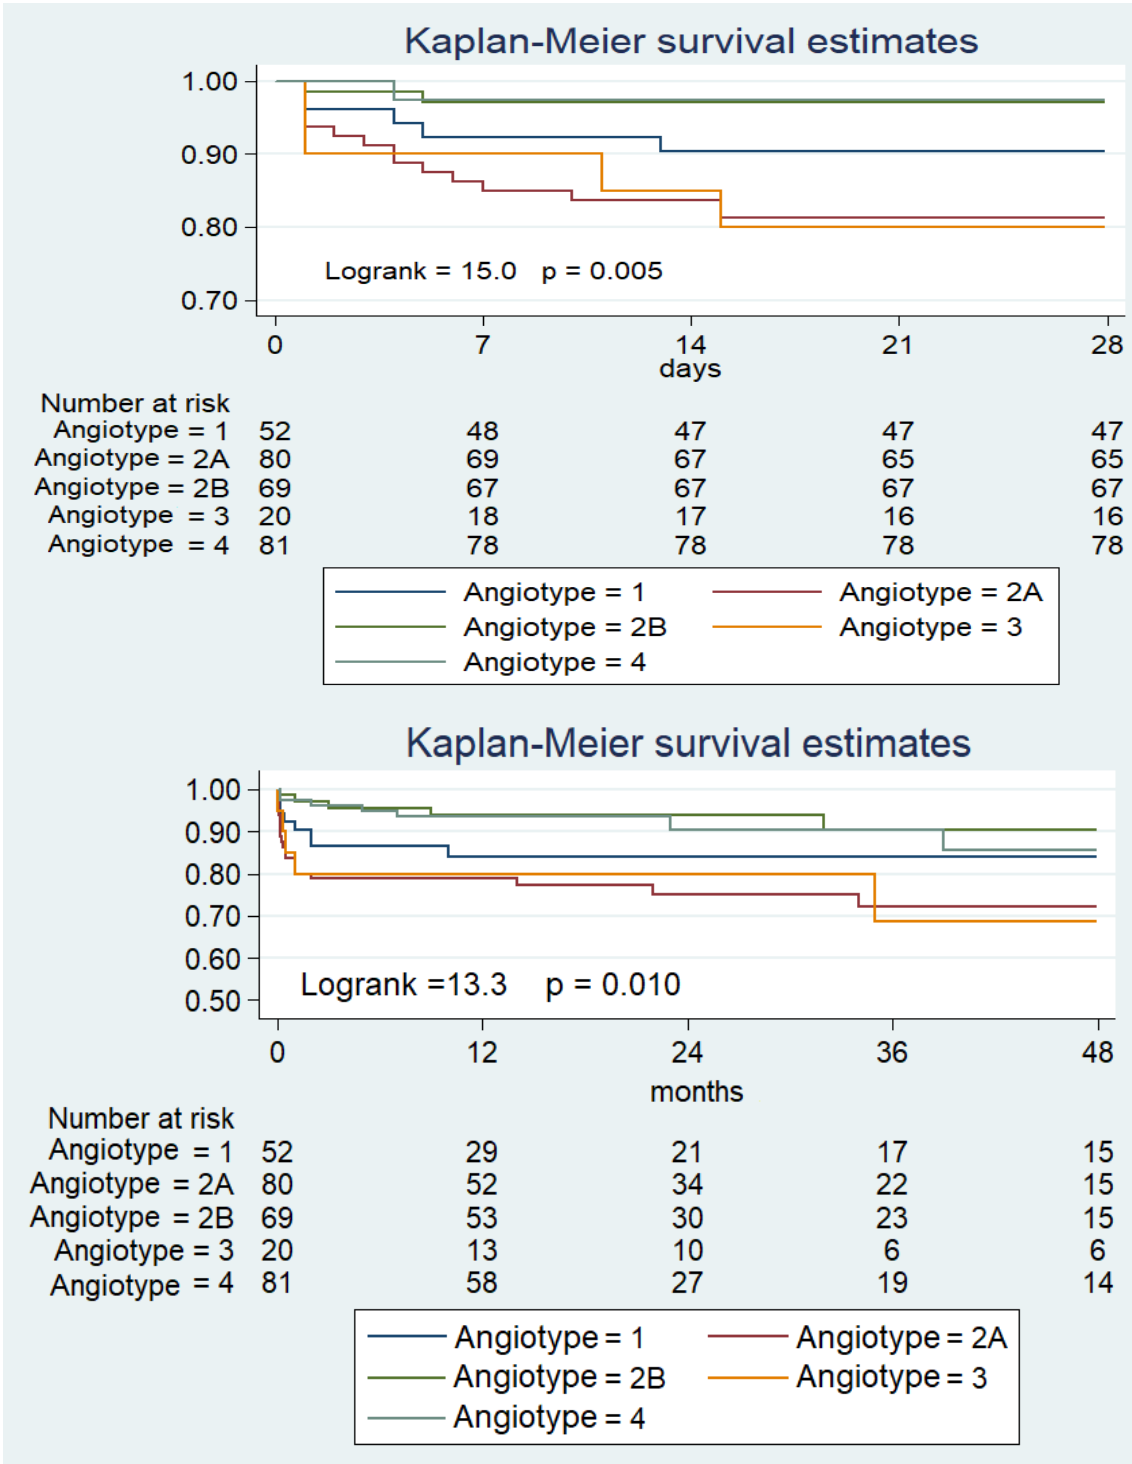

**Supplementary Figure 1.** Kaplan-Meier curves for MACE in all angiotypes (Adlam's classification) during the first 28 days and long-term follow-up.

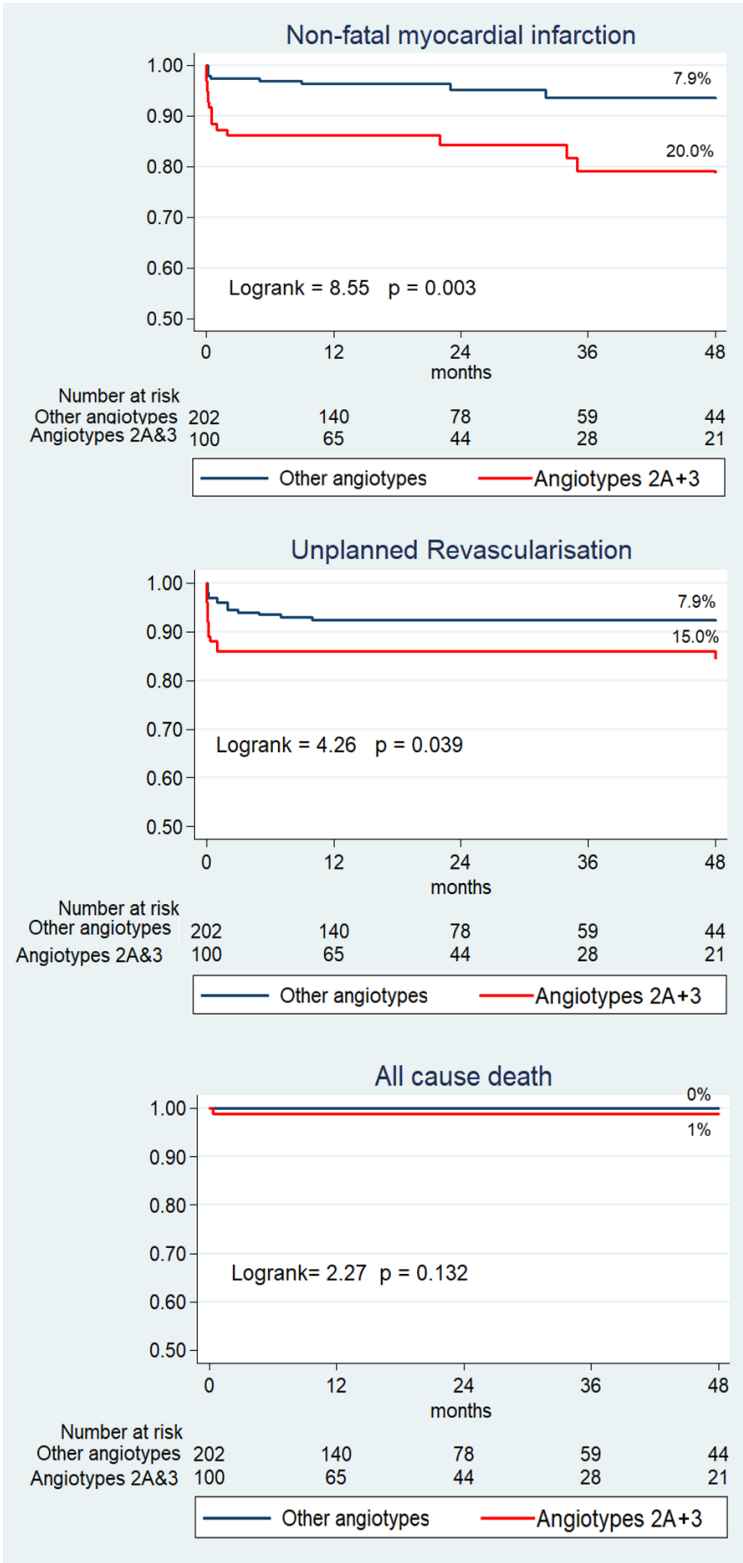

**Supplementary Figure 2.** Breakdown of the components of the composite major adverse cardiovascular events (MACE) in angiotypes 2A and 3 versus other angiotypes.

**Supplementary Table 1. Pharmacologic treatment in the studied population according to the initial therapeutic strategy.**

| <b>Medical treatment</b>      | <b>Total (n=302)</b> | <b>Conservative strategy (n=198)</b> | <b>Revascularisation strategy (n=104)</b> | <b>p-value</b> |
|-------------------------------|----------------------|--------------------------------------|-------------------------------------------|----------------|
| Single antiplatelet therapy   | 74 (24.5)            | 67 (33.8)                            | 7 (6.7)                                   | <0.001         |
| Dual antiplatelet therapy     | 228 (75.5)           | 131 (66.1)                           | 97 (93.3)                                 | <0.001         |
| At least 12-month DAPT length | 141 (46.7)           | 77 (38.9)                            | 64 (61.5)                                 | 0.001          |
| Beta-blockers                 | 246 (81.3)           | 159 (80.3)                           | 87 (83.7)                                 | 0.118          |
| ACE inhibitors/ARBs           | 171 (56.6)           | 111 (56.1)                           | 60 (57.7)                                 | 0.671          |
| Statins                       | 213 (70.5)           | 140 (70.7)                           | 73 (70.2)                                 | 0.589          |
| Calcium channel blockers      | 29 (9.6)             | 21 (10.6)                            | 8 (7.7)                                   | 0.752          |

ACE: angiotensin-converting enzyme; ARBs: angiotensin receptor blockers; DAPT: dual antiplatelet therapy

**Supplementary Table 2. MACE predictor analysis.**

| Predictor                       | Univariate analysis |                 | Multivariate analysis |                 |
|---------------------------------|---------------------|-----------------|-----------------------|-----------------|
|                                 | HR                  | <i>p</i> -value | HR                    | <i>p</i> -value |
| Age, years                      | 0.97 (0.94-0.99)    | 0.043           | 0.98 (0.95-1.02)      | 0.527           |
| Men                             | 1.16 (0.49-2.73)    | 0.732           |                       |                 |
| Arterial hypertension           | 0.67 (0.36-1.25)    | 0.215           |                       |                 |
| Diabetes mellitus               | 0.71 (0.09-5.20)    | 0.742           |                       |                 |
| Smoking                         | 1.42 (0.80-2.54)    | 0.227           |                       |                 |
| Recent pregnancy                | 1.75 (0.24-13.04)   | 0.583           |                       |                 |
| Post-menopausal                 | 0.66 (0.32-1.37)    | 0.265           |                       |                 |
| Hormonal therapy                | 1.64 (0.79-3.40)    | 0.178           | 1.08 (0.32-3.66)      | 0.901           |
| Hypothyroidism                  | 0.58 (0.18-1.87)    | 0.365           |                       |                 |
| STEMI                           | 0.98 (0.55-1.72)    | 0.937           |                       |                 |
| Cardiac arrest                  | 1.80 (0.56-5.81)    | 0.323           |                       |                 |
| Initial TIMI flow 0             | 0.49 (0.21-1.17)    | 0.110           | 0.57 (0.20-1.65)      | 0.303           |
| Proximal segment affected       | 0.52 (0.10-2.53)    | 0.418           |                       |                 |
| LAD as culprit vessel           | 1.12 (0.64-1.97)    | 0.671           |                       |                 |
| Adlam type 2A & 3               | 2.34 (1.34-4.08)    | 0.003           | 2.44 (1.24-4.80)      | 0.010           |
| PCI as first treatment          | 1.45 (0.79-2.66)    | 0.229           |                       |                 |
| OCT use                         | 0.68 (0.24-1.94)    | 0.480           |                       |                 |
| Beta-blocker treatment          | 0.83 (0.40-1.72)    | 0.616           |                       |                 |
| SAP                             | 0.38 (0.16-0.91)    | 0.029           | 0.31 (0.11-0.87)      | 0.027           |
| Anticoagulation                 | 1.51 (0.59-3.84)    | 0.383           |                       |                 |
| New P2Y <sub>12</sub> inhibitor | 1.94 (1.03-3.68)    | 0.040           | 2.07 (0.98-4.36)      | 0.056           |

LAD: left anterior descending artery; OCT: optical coherence tomography; PCI: percutaneous coronary intervention; SAP: single antiplatelet therapy; STEMI: ST-elevation myocardial infarction; TIMI: Thrombolysis In Myocardial Infarction

**Supplementary Table 3. MACE during 48 months of follow-up according to the initial therapeutic strategy in each angiotype.**

| Adlam`s classification | Total             | Conservative strategy |           | Total             | Revascularisation strategy |           | p-value * |
|------------------------|-------------------|-----------------------|-----------|-------------------|----------------------------|-----------|-----------|
|                        |                   | MACE -                | MACE+     |                   | MACE -                     | MACE +    |           |
| <b>Type 1, n=52</b>    | <b>27 (51.9)</b>  | 19 (70.4)             | 8 (29.6)  | <b>25 (48.1)</b>  | 22 (88)                    | 3 (12.0)  | 0.177     |
| <b>Type 2A, n=80</b>   | <b>61 (76.2)</b>  | 48 (78.7)             | 13 (21.3) | <b>19 (23.8)</b>  | 12 (63.2)                  | 7 (36.8)  | 0.226     |
| <b>Type 2B, n=69</b>   | <b>59 (85.5)</b>  | 54 (91.5)             | 5 (8.5)   | <b>10 (14.5)</b>  | 9 (90)                     | 1 (10.0)  | 1         |
| <b>Type 3, n=20</b>    | <b>13 (65)</b>    | 10 (76.9)             | 3 (23.1)  | <b>7 (35)</b>     | 5 (71.5)                   | 2 (28.5)  | 1         |
| <b>Type 4, n=81</b>    | <b>38 (46.9)</b>  | 38 (100)              | 0 (0)     | <b>43 (53.1)</b>  | 37 (86.1)                  | 6 (13.9)  | 0.027     |
| <b>Total, n=302</b>    | <b>198 (65.6)</b> | 168 (85.4)            | 29 (14.6) | <b>104 (34.4)</b> | 85 (81.7)                  | 19 (18.3) | 0.426     |

\* p-value (for MACE+) comparing conservative strategy versus revascularisation strategy.
